# Supplementary material
Source: PubMed Central journal article supplement (PMC4174923)
Supplement: 7d26b390182cfd7ea074c0633e48c4f5_genetics.114.167056-4.pdf [file 7d26b390182cfd7ea074c0633e48c4f5_genetics.114.167056-4.pdf]

**Table S1 Candidate non-synonymous coding SNPs for Open Field and Conditioned Fear QTLs.** Table columns from left to right are: (1) chromosome; (2) base pair position of SNP, and strand; (3) gene; (4) gene symbol; (5) total number of nonsynonymous SNPs identified in gene. Available for download at <http://www.genetics.org/lookup/suppl/doi:10.1534/genetics.114.167056/-/DC1>

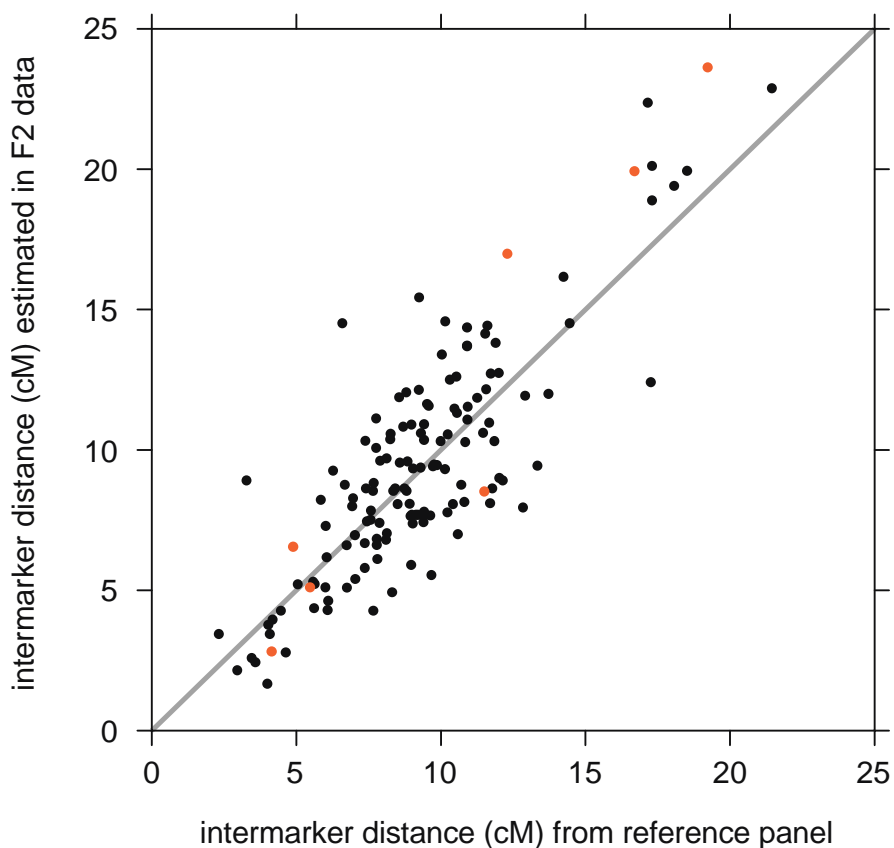

**Figure S1 Comparison of reference genetic map and genetic distances estimated from F2 genotype data.** Each point in scatterplot corresponds to a single SNP on the X chromosome (orange) or an autosomal chromosome (black). Intermarker distances are shown in centiMorgans (cM).
