# Supplementary material
Source: PubMed Central journal article supplement (PMC4174923)
Supplement: 8ccc7b4fd125c164848df4afbcfabb27_genetics.114.167056-2.pdf [file 8ccc7b4fd125c164848df4afbcfabb27_genetics.114.167056-2.pdf]

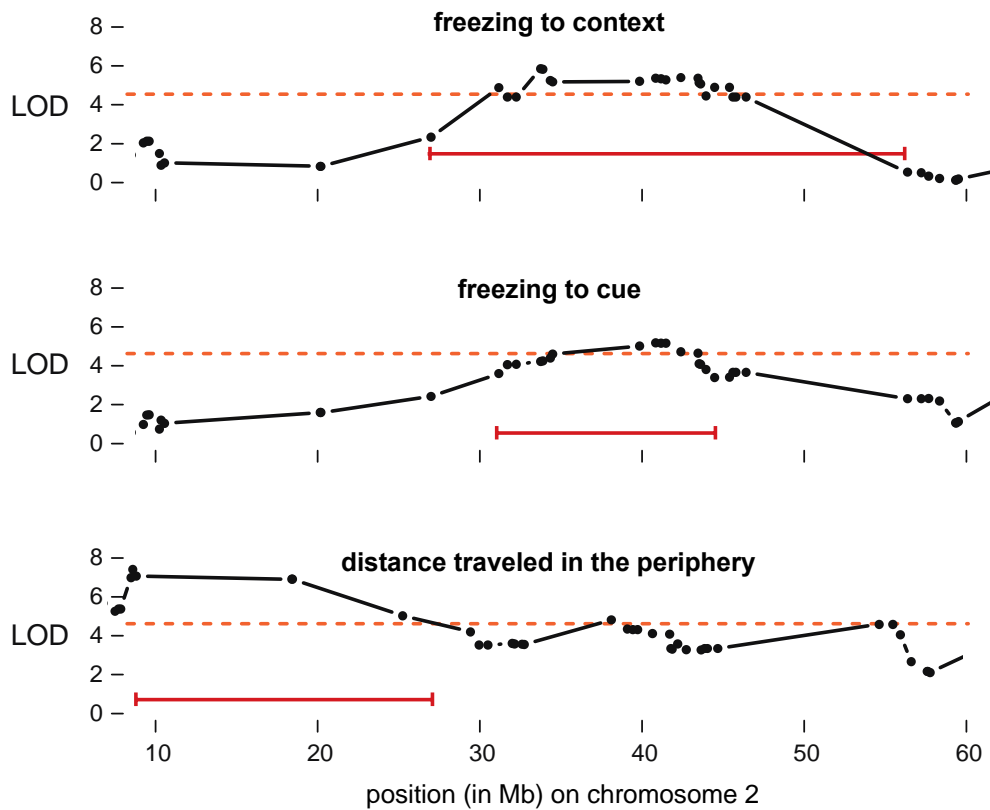

**Figure S2 Overlapping QTL region on chromosome 2 for freezing to context and freezing to cue, and adjacent QTL region on chromosome 2 for distance traveled in the periphery.** LOD scores quantify support for association at SNPs, accounting for differences in genetic sharing using marker-based estimates of pairwise relatedness. Note that LOD scores for freezing to cue are obtained by conditioning on effect of peak SNP (rs27453770) on the same chromosome. Horizontal red lines indicate 1.5-LOD support intervals. The dashed orange line shows the significance threshold at  $\alpha = 0.05$  obtained using the simple permutation test.
